# Supplementary material for: Semi-Embedding Zn-Co3O4 Derived from Hybrid ZIFs into Wood-Derived Carbon for High-Performance Supercapacitors
Source: MDPI journal article supplement (doi:10.3390/molecules27238572), 2022-12-05
Supplement: s1 [file s1]

# Supporting Information

## **Semi-Embedding Zn-Co<sub>3</sub>O<sub>4</sub> Derived from Hybrid ZIFs into Wood-derived Carbon for High-performance Supercapacitors**

*Wanning Xiong<sup>†</sup>, Jie Ouyang<sup>†</sup>, Xiaoman Wang, Ziheng Hua, Linlin Zhao Mengyao Li,  
Yuxin Lu, Wei Yin, Gonggang Liu\*, Cui Zhou, Yongfeng Luo\*, Binghui Xu*

<sup>†</sup> The authors are equal contribution

\*Corresponding authors: [liugonggang@csuft.edu.cn](mailto:liugonggang@csuft.edu.cn) (G.L.); [yfluo@csuft.edu.cn](mailto:yfluo@csuft.edu.cn)  
(Y.L.)

**A: Calculate the single-electrode capacitance under the three-electrode system**

The volume and specific capacitance of a single electrode in a three-electrode cell configuration can be calculated according to their GCD curves by the following equations:

$$C_{(Volume)} = \frac{I \times \Delta t}{V \times \Delta U}$$
$$C_{(Specific)} = \frac{I \times \Delta t}{m \times \Delta U}$$

where  $I$  is the discharge current,  $\Delta t$  is the discharge time,  $\Delta U$  is the potential window of the discharge process,  $V$  is the effective volume of the electrode, and  $m$  is the mass of active material.

**B: Calculate the asymmetric supercapacitor capacitance under the two-electrode system**

The volume and specific capacitance of asymmetric supercapacitor under the two-electrode system can be calculated according to their GCD curves by the following equations:

$$C_{(Volume)} = \frac{I \times \Delta t}{V \times \Delta U}$$
$$C_{(Specific)} = \frac{I \times \Delta t}{m \times \Delta U}$$

In this case,  $V$  is the total volume of the two electrodes, and  $m$  is the total mass of the device. The energy density ( $E$ ) and power density ( $P$ ) were calculated according to the following equations respectively:

$$E = \frac{1}{2} \times C \times \Delta U^2$$
$$P = \frac{E}{\Delta t}$$

where  $C$  is the volume or specific capacitance of the asymmetric supercapacitor,  $\Delta t$  and

$\Delta U$  are the discharge time and potential window of the discharge process.

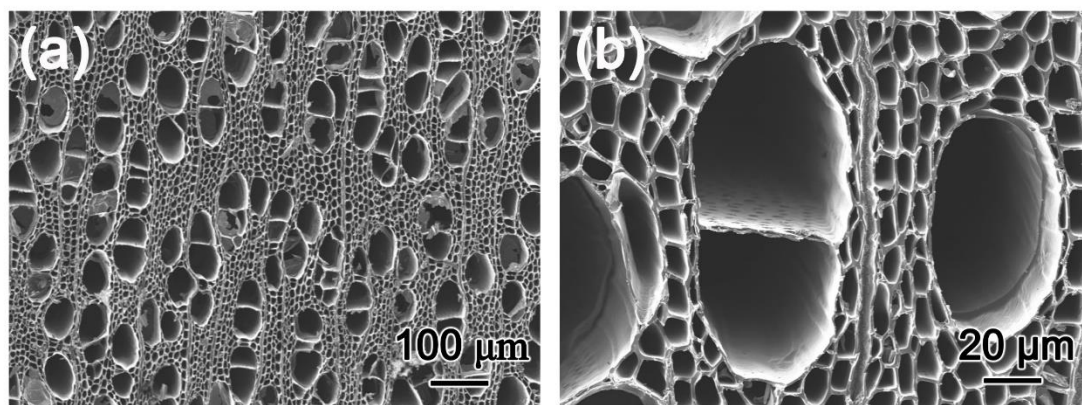

**Figure S1.** SEM of the poplar wood slice: perpendicular to the growth direction at different magnification times

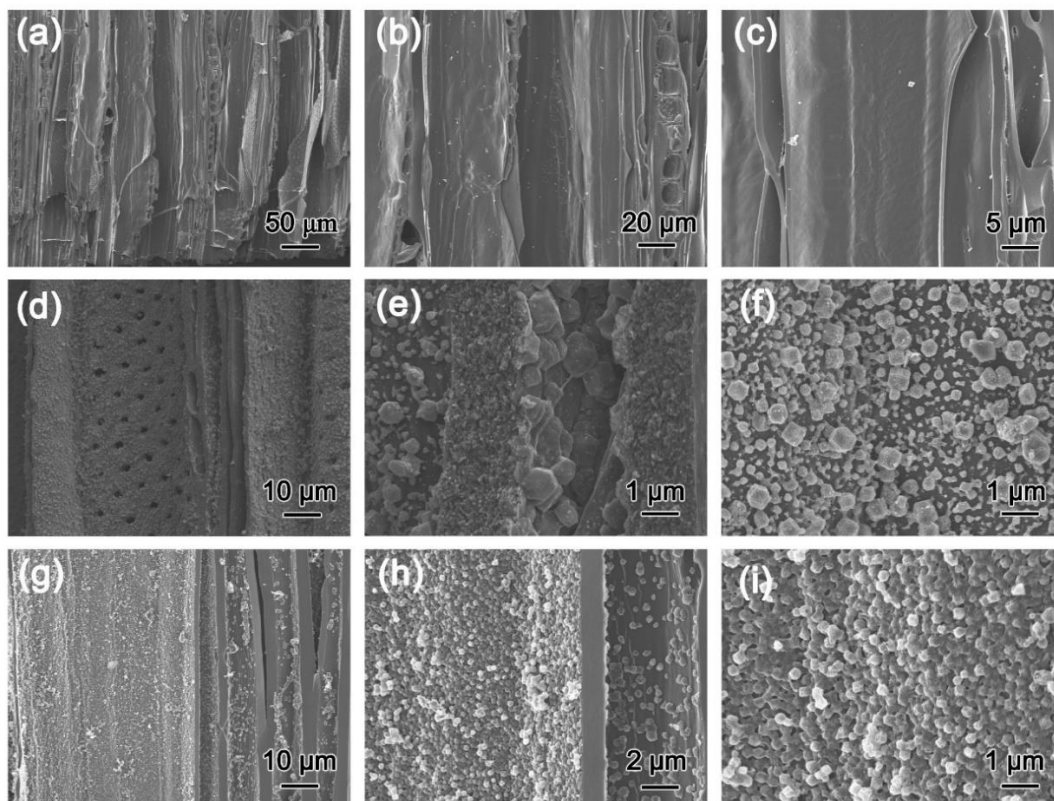

**Figure S2.** SEM images of nature wood (a-c), Co<sub>3</sub>O<sub>4</sub>@CW-230 (d-f) and Zn@CW-230 (g-i)

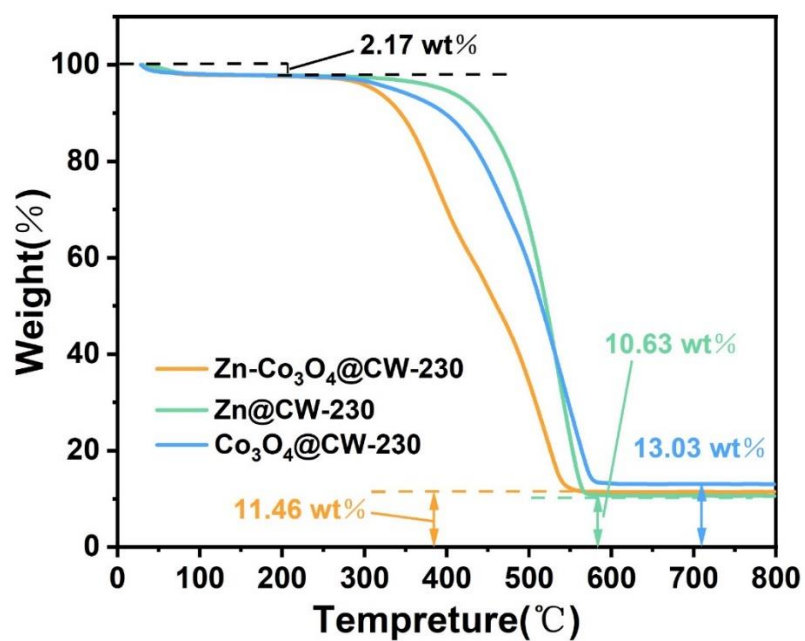

**Figure S3.** TGA curves of Zn@CW-230, Co<sub>3</sub>O<sub>4</sub>@CW-230, Zn-Co<sub>3</sub>O<sub>4</sub>@CW-230 composites in air.

**Table S1.** Analysis results of energy dispersive X-ray spectrogram

| Element | Weight% | Atpmic% |
|---------|---------|---------|
| C K     | 74.11   | 87.05   |
| N K     | 0.76    | 0.77    |
| O K     | 9.64    | 8.50    |
| Co K    | 14.49   | 3.47    |
| Zn K    | 0.98    | 0.21    |

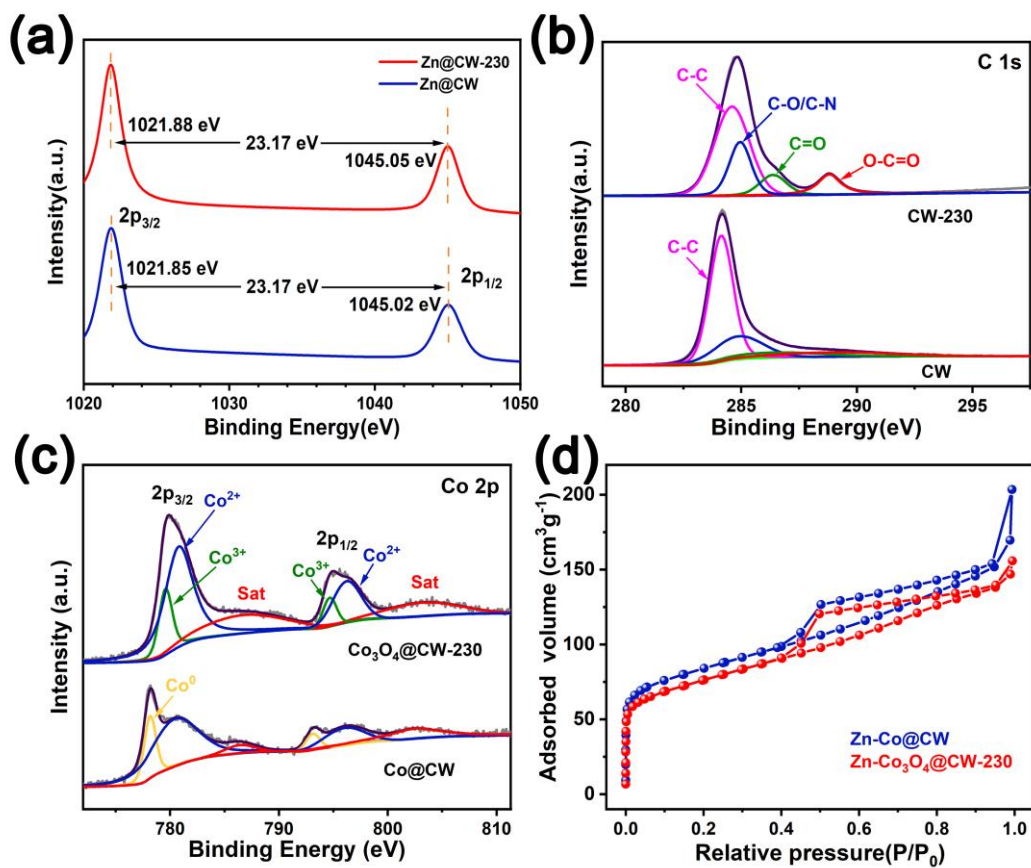

**Figure S4.** XPS spectra of Zn@CW and Zn@CW-230 for Zn 2p (a); CW and CW-230 for (b) C 1s; Co@CW and Co<sub>3</sub>O<sub>4</sub>@CW-230 for (c) Co 2p. (d) N<sub>2</sub> adsorption-desorption isotherm.

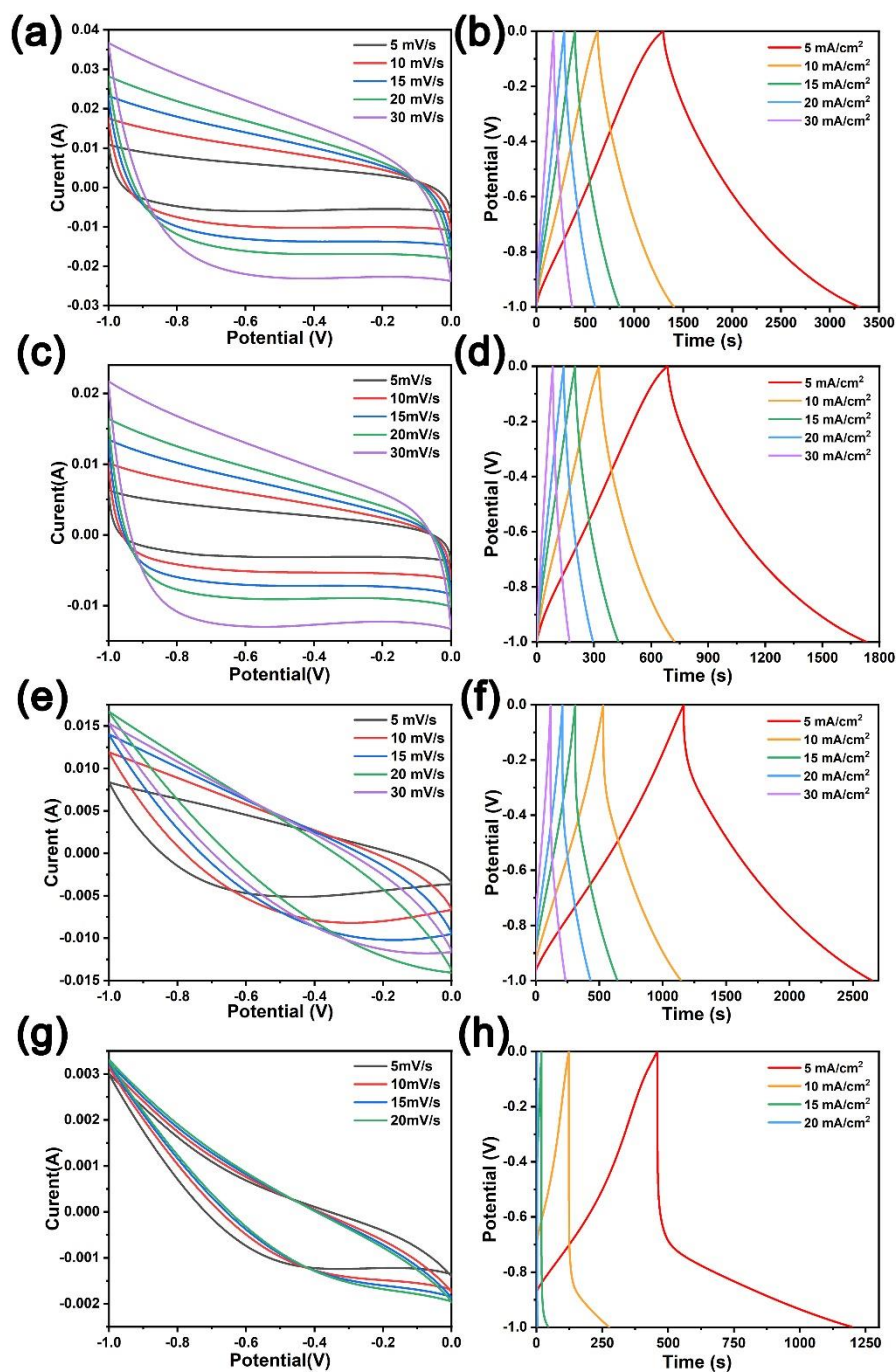

**Figure S5.** Cyclic voltammograms (CVs) at different scan rates and galvanostatic charge–discharge curves at different current densities of (a and b) Zn-Co@CW; (c and d) Co@CW; (e and f) Zn@CW; (g and h) CW.



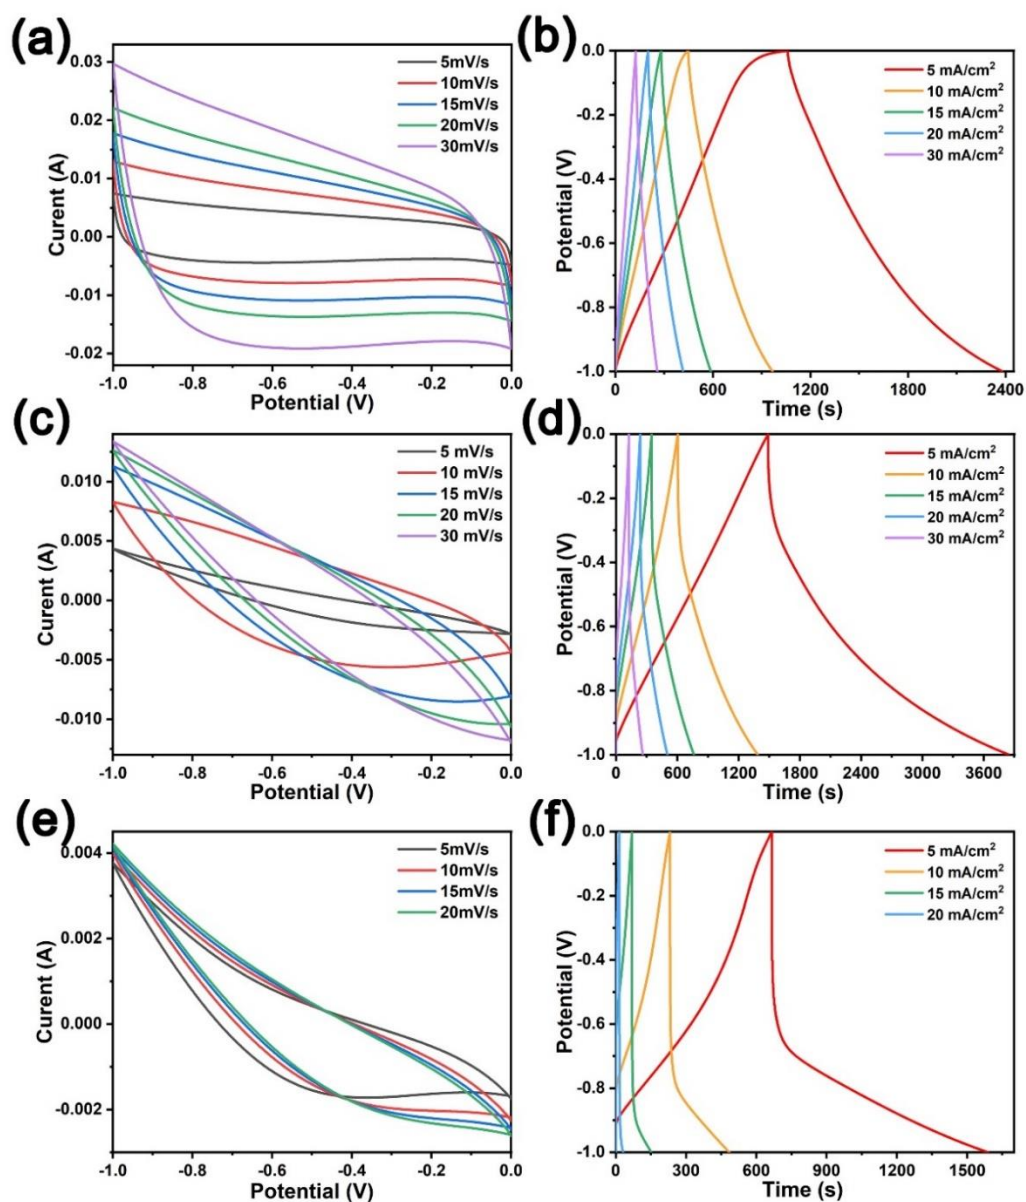

**Figure S6.** Cyclic voltammograms (CVs) at different scan rates and galvanostatic charge–discharge curves at different current densities of (a and b) Co<sub>3</sub>O<sub>4</sub>@CW-230; (c and d) Zn@CW-230; (e and f) CW-230.

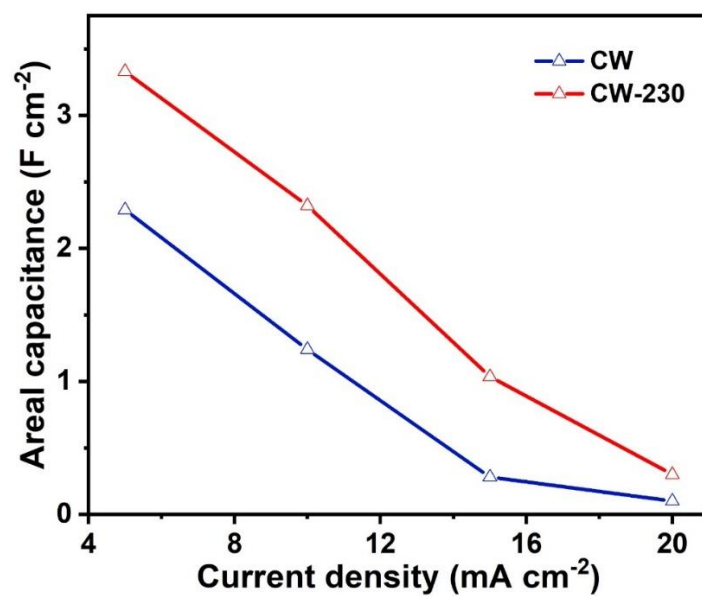

**Figure S7.** Specific capacitances of CW, CW-230 at different current densities.

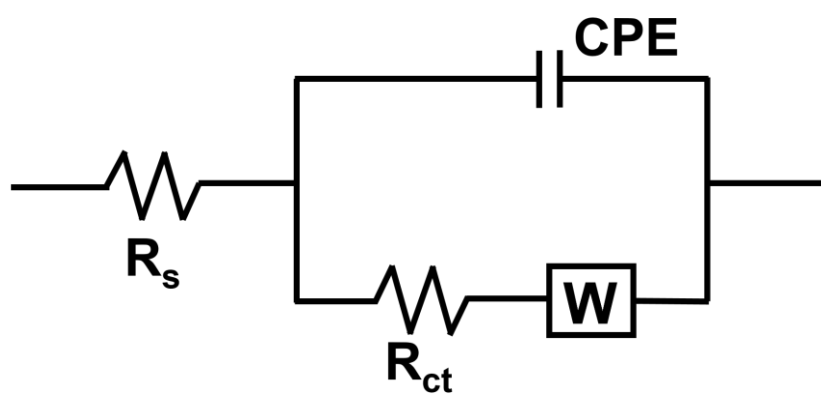

**Figure S8.** Equivalent circuit diagram fitted by Nyquist diagram.



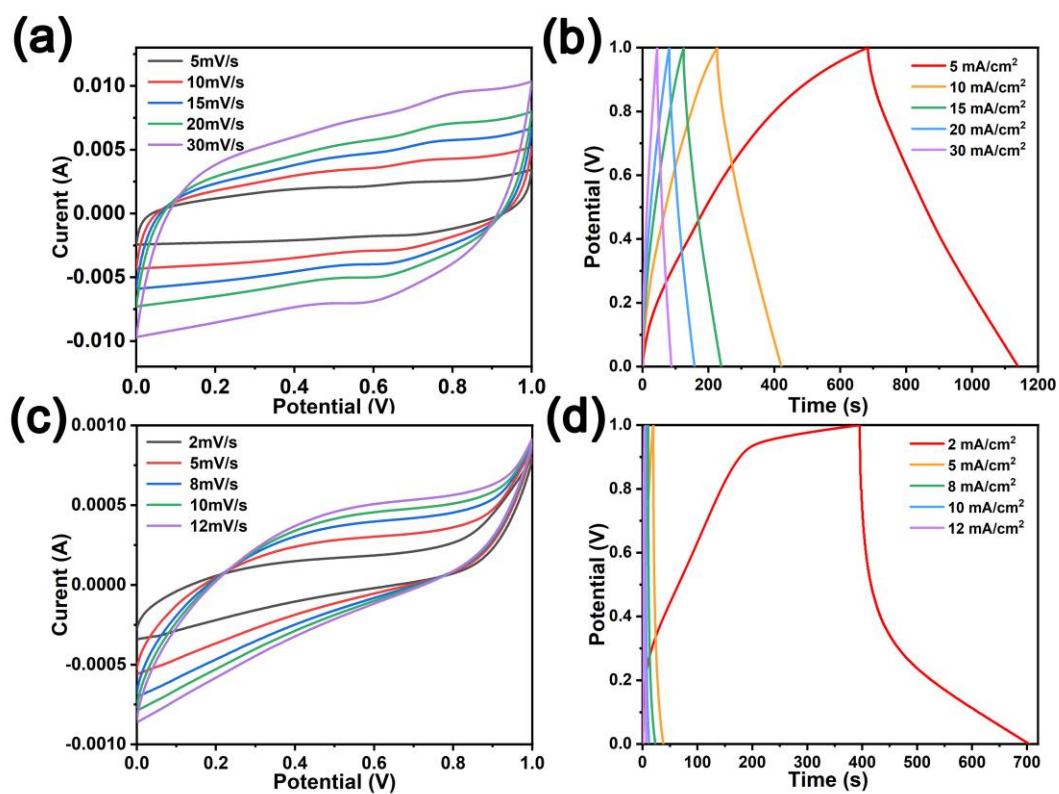

**Figure S9.** CVs at different scan rates and GCD curves at different current densities of (a and b) SC of Co<sub>3</sub>O<sub>4</sub>@CW-230. (c and d) SC of CW-230.

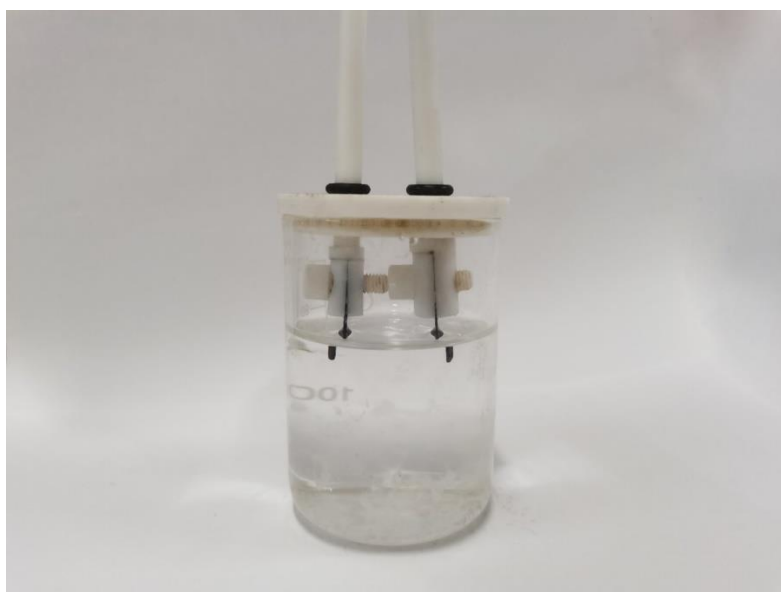

**Figure S10.** Photos of a two-electrode system of the Zn-Co<sub>3</sub>O<sub>4</sub>@CW-230 liquid-

state SC.

**Table S2.** Comparison of electrochemical performance of SC of Zn-Co<sub>3</sub>O<sub>4</sub>@CW-230 and some representative carbon-/metal oxide-based electrodes at device level.

| Electrode material                                        | Volumetric Energy density<br>(mW h cm <sup>-3</sup> )   | Cycles/<br>retention | Specific<br>capacitances                           | Ref.                        |
|-----------------------------------------------------------|---------------------------------------------------------|----------------------|----------------------------------------------------|-----------------------------|
| CW@CoNiP-C//CW                                            | /                                                       | 5000/<br>87.5%       | 1280 mF/cm <sup>2</sup> ,<br>5 mA/cm <sup>2</sup>  | [1]                         |
| NCS-ES/CW-20//AC                                          | 69.03 Wh/Kg,<br>862.88 W/kg                             | 5000/<br>102%        | 125.8 F/g,<br>1 A/g                                | [2]                         |
| MnO <sub>2</sub> /ZnO//RGO                                | 0.234 mW h/cm <sup>3</sup> ,<br>133 mW/cm <sup>3</sup>  | 5000/<br>98.4%       | 250 mF/cm <sup>2</sup> ,<br>10 mV/s                | [3]                         |
| CoP/MnO <sub>2</sub> /CC                                  | 0.69 mW h/cm <sup>3</sup> ,<br>114.2 mW/cm <sup>3</sup> | 5000/<br>82%         | 571.3 mF/cm <sup>2</sup> ,<br>1 mA/cm <sup>2</sup> | [4]                         |
| Fe <sub>2</sub> O <sub>3</sub> /MnO <sub>2</sub>          | 0.55 mW h/cm <sup>3</sup> ,<br>139.1 mW/cm <sup>3</sup> | 5000/<br>84%         | 180.4 mF/cm <sup>2</sup> ,<br>1 mA/cm <sup>2</sup> | [5]                         |
| Co <sub>3</sub> O <sub>4</sub> /graphene hybrid<br>fibers | /                                                       | 10000/<br>72.7%      | 196.3 mF/cm <sup>2</sup> ,<br>0.2 mA/g             | [6]                         |
| CoSe <sub>2</sub> //CC                                    | 0.588 mW h/cm <sup>3</sup> ,<br>282 mW/cm <sup>3</sup>  | 2000/<br>94.8%       | 332 mF/cm <sup>2</sup> ,<br>1 mA/cm <sup>2</sup>   | [7]                         |
| C-ZIF-8@ACW                                               | 4.4 mW h/cm <sup>3</sup><br>4.0mW/cm <sup>3</sup>       | 10000/<br>96.8%      | 3935 mF/cm <sup>2</sup> ,<br>1 mA/cm <sup>2</sup>  | [8]                         |
| Zn-Co <sub>3</sub> O <sub>4</sub> @CW-230                 | 6.0 mW h /cm <sup>3</sup><br>41.7 mW/cm <sup>3</sup>    | 10000/<br>97.3%      | 2610 mF/cm <sup>2</sup> ,<br>5 mA/cm <sup>2</sup>  | <b><i>This<br/>work</i></b> |

## Reference

1. Tian, R.; Duan, C.; Feng, Y.; Cao, M.; Yao, J., Metal Organic Framework-Based CoNi Composites on Carbonized Wood as Advanced Freestanding Electrodes for Supercapacitors. *Energy & Fuels* **2021**, 35, (5), 4604-4608.
2. Rafiq, M. I.; Farid, T.; Zhou, J.; Ali, A.; Tang, J.; Tang, W., Carbonized wood-supported hollow NiCo<sub>2</sub>S<sub>4</sub> eccentric spheres for high-performance hybrid supercapacitors. *Journal of Alloys and Compounds* **2019**, 811, 151858.
3. Zilong, W.; Zhu, Z.; Qiu, J.; Yang, S., High performance flexible solid-state asymmetric supercapacitors from MnO<sub>2</sub>/ZnO core-shell nanorods//specially reduced graphene oxide. *J. Mater. Chem. C* **2014**, 2, (7), 1331-1336.
4. Zheng, Z.; Retana, M.; Hu, X.; Luna, R.; Ikuhara, Y. H.; Zhou, W., Three-Dimensional Cobalt Phosphide Nanowire Arrays as Negative Electrode Material for Flexible Solid-State Asymmetric Supercapacitors. *ACS Appl Mater Interfaces* **2017**, 9, (20), 16986-16994.
5. Yang, P.; Ding, Y.; Lin, Z.; Chen, Z.; Li, Y.; Qiang, P.; Ebrahimi, M.; Mai, W.; Wong, C. P.; Wang, Z. L., Low-cost high-performance solid-state asymmetric supercapacitors based on MnO<sub>2</sub> nanowires and Fe<sub>2</sub>O<sub>3</sub> nanotubes. *Nano Lett* **2014**, 14, (2), 731-736.
6. Wang, W.; Yuan, Y.; Yang, J.; Meng, L.; Tang, H.; Zeng, Y.; Ye, Z.; Lu, J., Hierarchical core-shell Co<sub>3</sub>O<sub>4</sub>/graphene hybrid fibers: potential electrodes for supercapacitors. *J Mater Sci* **2018**, 53, (8), 6116-6123.
7. Yu, N.; Zhu, M.-Q.; Chen, D., Flexible all-solid-state asymmetric supercapacitors with three-dimensional CoSe<sub>2</sub>/carbon cloth electrodes. *Journal of Materials Chemistry A* **2015**, 3, (15), 7910-7918.
8. Zhang, W.; Li, M.; Zhong, L.; Huang, J.; Liu, M., A family of MOFs@Wood-Derived hierarchical porous composites as freestanding thick electrodes of solid supercapacitors with enhanced areal capacitances and energy densities. *Mater Today Energy* **2022**, 24.
